# Supplementary material for: Electrospun ZIF-67/PVDF composite membranes for efficient ciprofloxacin removal from wastewater
Source: Royal Society of Chemistry journal article supplement (doi:10.1039/d5ra00237k), 2025-01-01
Supplement: d5ra00237k1.pdf [file d5ra00237k1.pdf]

<sup>a</sup> College of Chemical Engineering, Sichuan University of Science and Engineering, Zigong, Sichuan, 643000, China.

<sup>b</sup> College of Chemical and Environmental Engineering, Sichuan University of Science and Engineering, Zigong, Sichuan, 643000, China.

## **Electrospun ZIF-67/PVDF composite membranes for efficient ciprofloxacin removal from wastewater**

Ping Li <sup>a,1</sup>, Xiaolin Yue <sup>a,1</sup>, Anhong Li <sup>b</sup>, Can Cui <sup>a</sup>, Lan Wang<sup>a</sup>, Wenyan Tan <sup>a, \*</sup>

<sup>1</sup> Ping Li and Xiaolin Yue contributed to the work equally and should be regarded as co-first authors.

\* E-mail: twyhyx@126.com

## 1. Adsorption thermodynamics and kinetics formulas

### 1.1 Adsorption isotherm and thermodynamics equations:

*Langmuir Isotherm.*

$$Q_e = \frac{Q_0 K_L C_e}{1 + K_L C_e} \#(S1)$$

$$R_L = \frac{1}{1 + K_L C_0} \#(S2)$$

Where,  $Q_e$  and  $C_e$  are for the equilibrium adsorption capacity and the remaining concentration of CIP in the equilibrium state, respectively;  $Q_0$  represents the maximum theoretical adsorption capacity;  $K_L$  represent the constants of the Langmuir adsorption models,  $R_L$  represent the equilibrium parameter,  $C_0$  represent the highest initial concentration.

*Freundlich Isotherm.*

$$Q_e = b C_e^{\left(\frac{1}{n}\right)} \#(S3)$$

where  $b$  is the adsorption capacity and  $1/n$  is the adsorption intensity or surface heterogeneity.

*The adsorption thermodynamics equations*

$$\Delta G^0 = -RT \ln K_0 \#(S4)$$

$$\Delta G^0 = \Delta H^0 - T \Delta S^0 \#(S5)$$

Where  $\Delta G^0$ ,  $\Delta H^0$ , and  $\Delta S^0$  are the free energy of adsorption, adsorption enthalpy and adsorption entropy respectively;  $R$  is the gas constant,  $T$  is the absolute temperature,  $K_0$  is the thermodynamic equilibrium constant and calculated by plotting  $\ln K_0$  ( $K_0 = Q_e/C_e$ ) versus  $C_e$  and extrapolating  $C_e$  to zero.

### 1.2 Adsorption kinetics equations

The equations for the pseudo-first-order (S6) and pseudo-second-order (S7) kinetics models:

$$\ln (Q_e - Q_t) = \ln Q_e - k_1 t \#(S6)$$

$$t/Q_t = 1/k_2 Q_e^2 + t/Q_e \#(S7)$$

Where  $Q_e$  and  $Q_t$  are the adsorption capacity at equilibrium and different time ( $t$ ), respectively,  $t$  is the adsorption time,  $k_1$  and  $k_2$  are the pseudo-first-order kinetic and pseudo-second-order kinetic constants respectively.

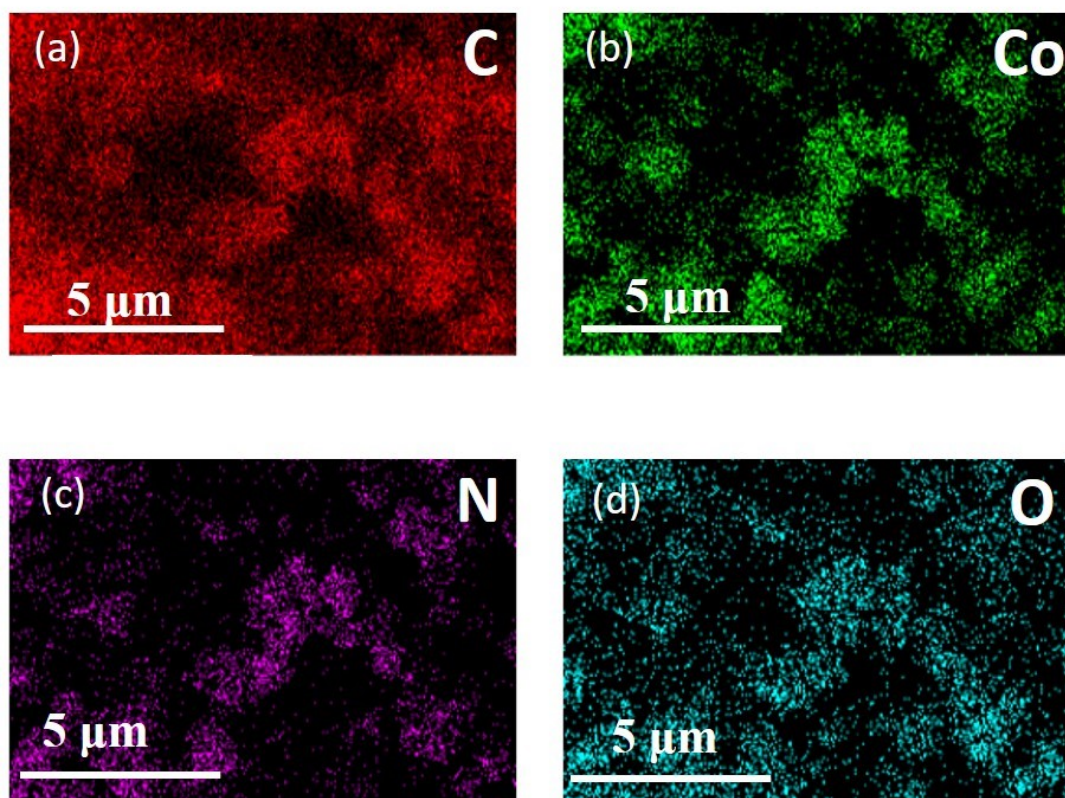

**Fig. S1** EDS mappings of ZIF-67 (a-d)

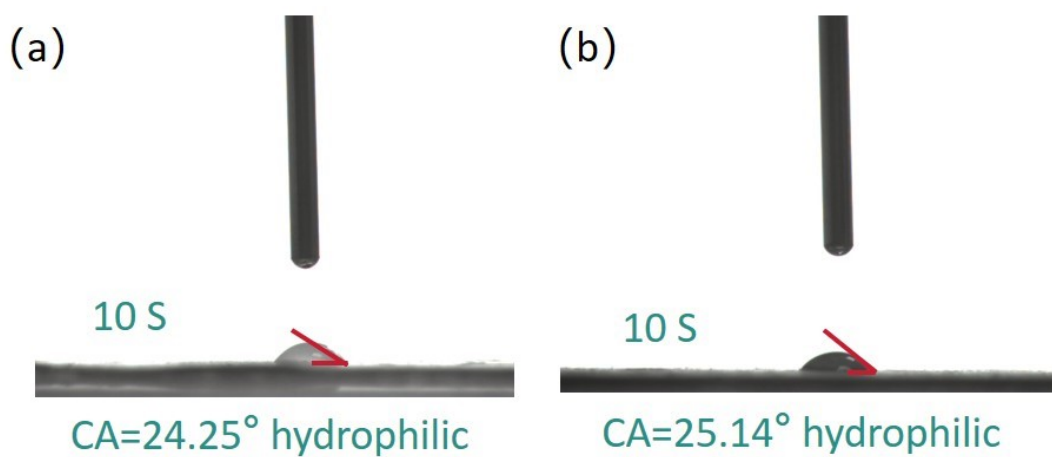

**Fig. S2** Static contact angles of PVP/PVDF(a) and ZIF-67/PVDF nanofiber membranes(b)

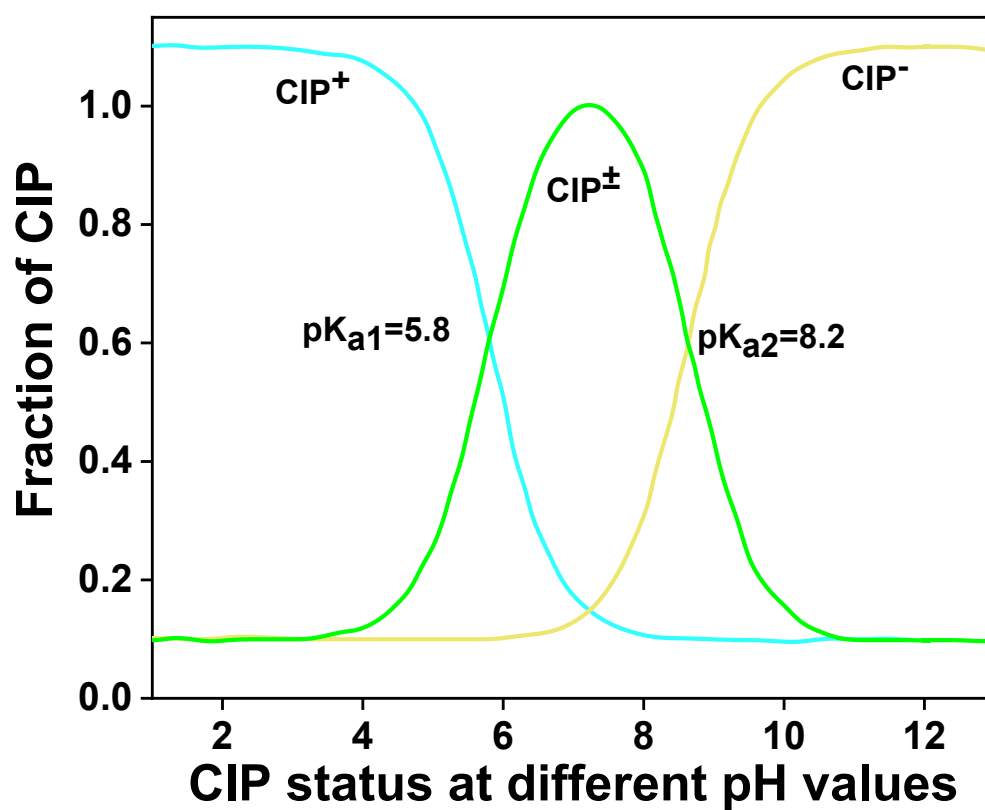

Fig. S3 CIP status at different pH values.

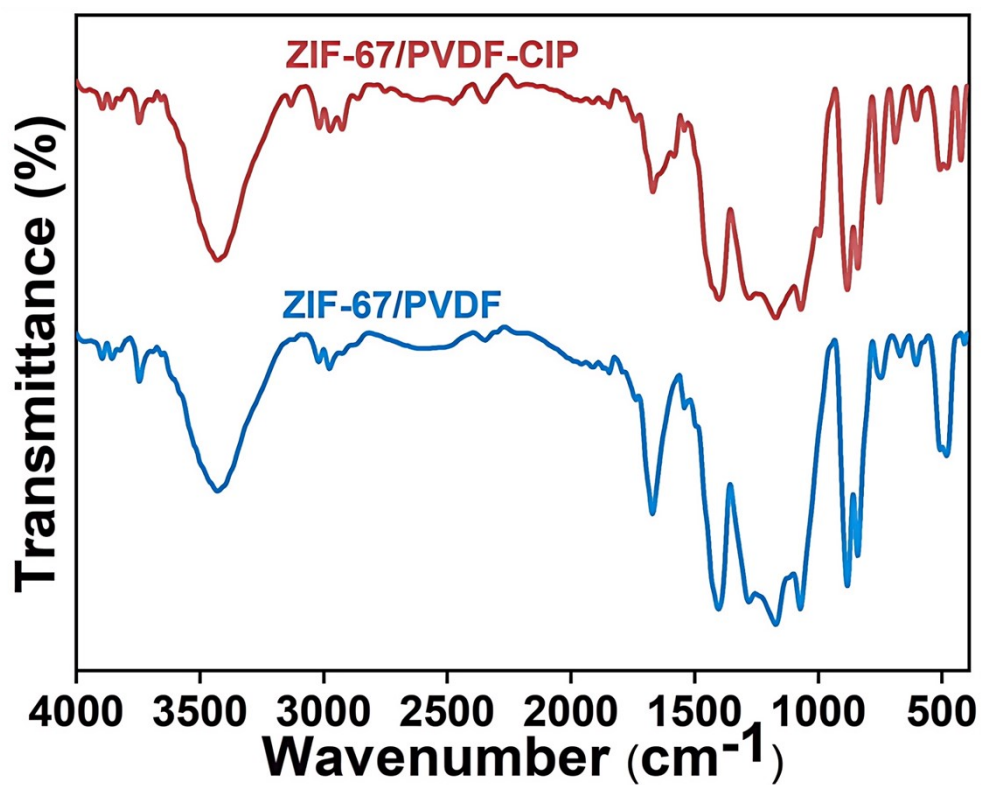

Fig. S4 FT-IR spectra for ZIF-67/PVDF before and after CIP adsorption.

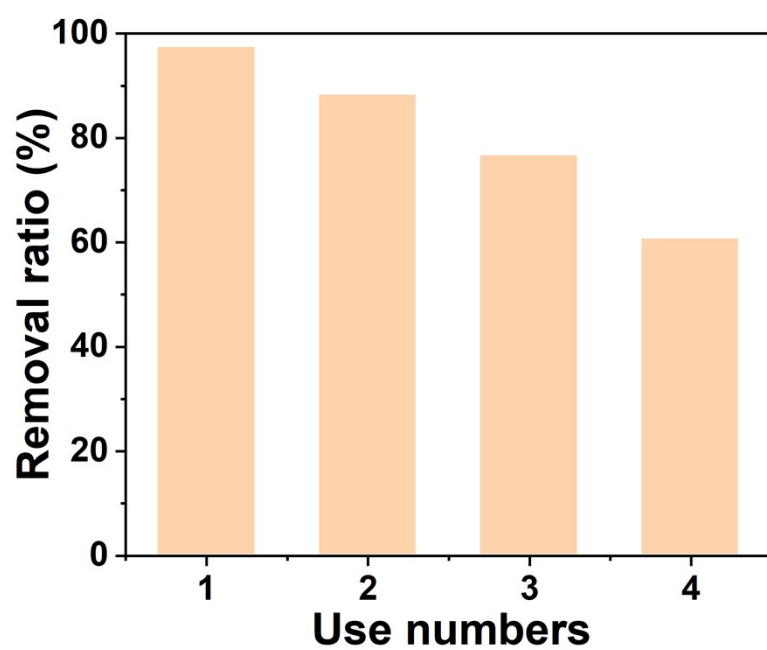

Fig. S5 Reusability of ZIF-67/PVDF for CIP adsorption.

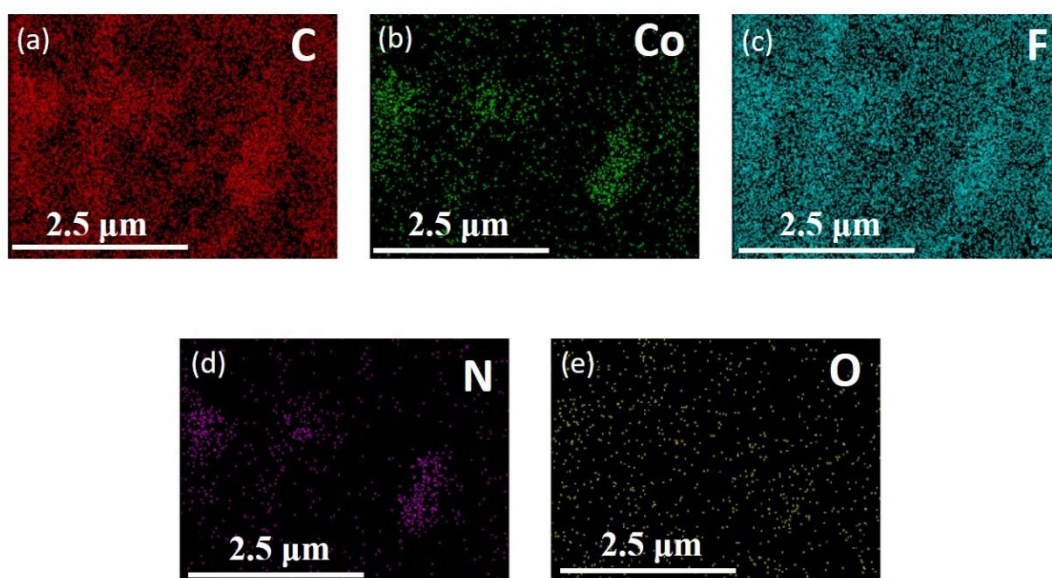

Fig. S6 EDS of ZIF-67/PVDF(a-e).
